# 1 **From the Ground Up: Stakeholder Perspectives on Housing Interventions to Reduce** 2 **Environmentally Mediated Infections**

3 Matthias Acklin,<sup>1</sup> Jay P. Graham,<sup>2</sup> Jade Benjamin-Chung<sup>3,4</sup>

4 1. Department of Health Sciences and Technology, Swiss Federal Institute of Technology Zurich  
5 (ETH Zurich)

6 2. Division of Environmental Health Sciences, University of California, Berkeley School of  
7 Public Health

8 3. Department of Epidemiology and Population Health, Stanford University

9 4. Chan Zuckerberg Biohub, San Francisco

10 \* Corresponding author: Jade Benjamin-Chung ([jadebc@stanford.edu](mailto:jadebc@stanford.edu))

11

## 12 **Abstract**

13 *Background:* Housing conditions are intrinsically linked to human health, with inadequate  
14 housing potentially increasing exposure to environmentally mediated pathogens. Housing  
15 interventions that aim to improve housing and reduce environmentally mediated infections, such  
16 as finished floors and housing upgrades for vector-borne diseases, remain relatively under-  
17 explored as health interventions. This study explored facilitators of and barriers to funding,  
18 implementing, and scaling up housing improvements as health interventions to reduce  
19 environmentally mediated infectious diseases.

20 *Methods:* Sixteen key informants (KIs) with direct experience in implementing or working  
21 within housing interventions and environmentally mediated infectious diseases in low- and  
22 middle-income countries were interviewed using a semi-structured interview format. KIs had  
23 diverse backgrounds, including academics researching housing interventions, housing policy  
24 advisors, and practitioners implementing housing interventions. A thematic analysis approach  
25 was used to identify key themes in interview transcripts, highlighting patterns, commonalities,  
26 and variations in participants' responses.

27 *Results:* KIs emphasized the multi-dimensional impacts of housing interventions that are  
28 intrinsically linked to Sustainable Development Goals (SDGs), including physical and mental  
29 health, as well as environmental, social, and economic dimensions. Moreover, a pronounced  
30 shortage of funding and financial systems to address housing interventions was highlighted,  
31 alongside the urgent need for more rigorous evidence and cost-benefit analyses. Furthermore, the  
32 imperative to raise awareness of the significance of housing and the critical importance of strong  
33 collaboration across sectors and stakeholders were stressed. Emphasizing the necessity for  
34 project-based and context-specific housing policies, the interviews revealed that contextualizing  
35 interventions to their specific setting and fostering community involvement are essential for  
36 successful implementation and scale-up.

37 *Conclusions:* Housing interventions play a pivotal role in mitigating environmentally mediated  
38 diseases. These interventions can complement existing strategies like water, sanitation, and  
39 hygiene (WASH) interventions, ensuring comprehensive approaches to healthy housing and  
40 sustainable development goals amidst climate change.

41

42 **Key words:** Housing interventions, Environmentally mediated diseases, Qualitative research,  
43 Thematic analysis

## 44 **Background**

45 Housing is a fundamental component of our living environment, providing shelter and space for  
46 essential services such as water supply, sanitation, and food preparation facilities [1]. As a  
47 determinant of health, improved housing has the potential to save lives, reduce disease, enhance  
48 quality of life, alleviate poverty, and contribute to climate change mitigation [2]. Additionally,  
49 improved housing can contribute to the achievement of several Sustainable Development Goals  
50 (SDGs), such as those addressing safe and affordable housing (11.1), infectious diseases (3.3), as  
51 well as non-communicable diseases (3.4) [3].

52 Globally, the United Nations estimates nearly one billion people live in makeshift  
53 structures considered inadequate; that number is estimated rise to 3 billion people by 2030 [4].  
54 Across 64 emerging economies, researchers estimated that 48% of households lacked  
55 construction with durable materials (defined as burnt bricks, tiles, shingles, iron sheets, or  
56 polished wood) [4]. Nearly half of sub-Saharan Africa's urban population resided in substandard  
57 housing in 2015 [5], and in many countries where national survey data are available, a high  
58 prevalence have dirt or sand floors: Guatemala (29.5% in DHS 2014-15); Haiti (33.8% in DHS  
59 2016-17); Timor-Leste (51.2% in DHS 2016) [6]. Housing factors that can augment disease risk  
60 are defects in 1) building structure, 2) water supply, 3) sanitation, 4) refuse storage and  
61 collection, and 5) food storage and preparation; and 6) diseases associated with the geographical  
62 location of the housing [1]. Substandard building structures where floors, walls, and roofs are  
63 primarily constructed from unfinished materials such as earth, sand, dung, mud, and thatch can  
64 facilitate the survival of pathogens in the home and make it more difficult to remove pathogens.  
65 Additionally, an unfinished roof or walls allow vectors to enter the home [5]. Thus, housing has

66 a link to environmentally mediated infections, such as malaria, shigellosis, and cholera, which  
67 accounted for 40% of the global infectious disease burden in 2015 [7].

68 Housing interventions that aim to reduce environmentally mediated infections are,  
69 therefore, a concern of substantial importance to public health. Biomedical and pharmaceutical  
70 treatments often do not address environmental pathogen reservoirs and thus may not be able to  
71 achieve sustained reductions in transmission disease on their own [7]. While decades of research  
72 have investigated effects of water, sanitation, and hygiene (WASH) interventions on  
73 environmentally mediated infections [8–13], which are elements of housing, more  
74 comprehensive upgrades to housing infrastructure have been relatively unexplored by  
75 researchers and program implementers. Most existing evidence on the impact of housing  
76 interventions on infectious diseases in low- and middle-income countries can be broadly  
77 categorized into two main research areas: finished floors and housing upgrades for vector-borne  
78 diseases (Figure 1).

79 A number of observational studies have investigated impacts of replacing dirt floors with  
80 finished floors (e.g., wood, cement, or tile) on health. A study that replaced dirt floors with  
81 concrete in Mexico in the early 2000s (Piso Firme) found decreased parasitic infestations,  
82 diarrhea, anemia, and adult depression, and improved children’s cognitive development, adult  
83 quality of life, and adult happiness [14]. A 2023 meta-analysis reported that living in a home  
84 with improved floors was associated with 25% lower risk of any enteric or parasitic infection  
85 compared to living in a home with unimproved floors [15]. Because all prior studies on this topic  
86 have been observational, the authors emphasized the urgent need for rigorous experimental  
87 studies [15].

88           A relatively large number of studies have also investigated housing improvements that  
89   reduce vector entry into the home in order to reduce malaria [16]. These structural components  
90   include but are not limited to, lightweight and durable roofs with partially closed eaves, screened  
91   façades and openings, outdoor latrines, raised sleeping areas, and raised homes [16].  
92   Additionally, housing upgrades to increase ventilation and airflow can reduce indoor carbon  
93   dioxide, which attracts mosquitoes [17], and improve indoor temperature, which may increase  
94   use of bed nets [18]. Two meta-analyses from 2021 and 2023 both found that housing  
95   interventions offer a significant protection against malaria and dengue [19, 20]. However, the  
96   authors highlighted that most studies were observational, with very low to low quality evidence  
97   [19, 20].

98           The objective of this study was to explore facilitators of and barriers to funding,  
99   implementing, and scaling up housing improvements as health interventions to reduce  
100   environmentally mediated infectious diseases in low- and middle-income countries. Specifically,  
101   we aimed to 1) analyze the perceived relationship between housing and health among key  
102   informants, 2) identify barriers and success factors when implementing housing interventions, 3)  
103   describe the funding landscape of housing interventions for health, and 4) describe how  
104   successful housing interventions could be scaled-up. We employed a qualitative approach based  
105   on in-depth interviews with key informants who had direct experience implementing or working  
106   on housing interventions and environmentally mediated infectious diseases in low- and middle-  
107   income countries.

108           **Figure 1**

109

## 110 **Methods**

### 111 *Recruitment*

112 We selected key informants (KIs) via purposive sampling, including 1) individuals in academic  
113 fields involved in researching housing interventions, 2) individuals involved in the development  
114 and passing of housing policies, and 3) individuals from non-governmental organizations  
115 working on housing improvements. We identified potential interviewees working in urban, peri-  
116 urban, and rural contexts through the authors' professional network, web searches, and  
117 snowballing technique. Fifty individuals were contacted via e-mail, 28 replied, and 16 completed  
118 interviews (Table 1). Participants provided informed consent prior to each respective interview.

### 119 *Data collection*

120 We conducted interviews via Zoom videoconference that lasted between 18 and 70 minutes,  
121 averaging 40 minutes. Based on the participant's roles, two distinct semi-structured interview  
122 guides were used, tailored to capture insights from either a researcher/implementer or a policy  
123 perspective (Supplementary Material 1). Zoom was used to generate initial transcripts, which  
124 were subsequently checked against the audio files for accuracy.

### 125 *Data analysis*

126 Following transcription, the interview transcripts were uploaded into the qualitative data analysis  
127 software NVivo (Version 14). Thematic analysis with an inductive, reflexive, experiential  
128 approach was applied to explore diverse experiences and perspectives and identify themes from  
129 the data without preconceived categories [21, 22]. The analysis followed a recursive process  
130 comprising six overlapping phases: 1) familiarization with the data; 2) systematic generation of  
131 open codes which identified and briefly described relevant and interesting segments; 3)

132 generation of initial themes by collating relevant codes; 4) further development and revision of  
133 themes 5) final definition and naming of themes; 6) writing the report, incorporating illustrative  
134 examples and interpretations.

## 135 **Table 1**

### 136 **Results**

#### 137 *Themes*

138 Based on the in-depth interviews, seven themes were identified in the analysis of stakeholder's  
139 perspectives on housing interventions. These included: 1) Communicating the multifaceted  
140 impacts of housing interventions, 2) Breaking silos and sector-building, 3) Building the evidence  
141 on health impacts and cost-effectiveness, 4) The role of governments, private institutions, and  
142 communities in scale-up and need for collaboration, 5) Financing challenges and priorities, 6)  
143 Policy and regulatory framework, 7) Addressing contextual and operational challenges.

#### 144 *Communicating the multifaceted impacts of housing interventions*

145 Multiple KIs emphasized the wide-ranging effects of housing interventions on health, noting that  
146 they extend beyond addressing one single disease. These included vector-borne diseases like  
147 malaria and dengue fever, diarrheal diseases, respiratory illnesses, and water-borne diseases like  
148 cholera and typhoid fever.

149 KI 2 described how the combination of factors, including recurrent attacks of malaria, diarrhea,  
150 and poor nutrition, collectively diminish a child's resilience in a low-income setting, ultimately  
151 increasing risk of mortality.

152           *“So, although the final death is due to malaria, if that child was fit and healthy, they’d be*  
153           *more resistant, less likely to die from malaria. And that’s true for all the major killer*  
154           *diseases. It’s the fact that the child has everything else since it’s born. It’s had a whole*  
155           *succession. Because it lives in a dirty environment.”* (KI 2, Researcher)

156    On a similar note, KI 6 highlighted how numerous factors of the built environment can influence  
157    the residents’ well-being, including but not limited to temperature, moisture, overheating,  
158    lighting, acoustics, and overcrowding.

159    While discussing the health implications of housing interventions, several KIs emphasized their  
160    significance in preventing diseases.

161           *“We call healthy housing an architectural vaccine. That’s the way to really do a lot of*  
162           *disease prevention.”* (KI 8, Practitioner/Service manager)

163    Multiple interviewees indicated that by enhancing housing conditions, residents experience  
164    fewer illnesses, enabling them to pursue their professional, social, and personal goals more  
165    effectively. Describing the impacts of replacing dirt floors with finished floors, KI 9 noted:

166           *“We have been able to see people, when you take away one significant worry from their*  
167           *life, like housing, they are able to expend the mental, and spiritual, and physiological*  
168           *energies towards something else, like improving their education, going after a better job,*  
169           *even just child rearing – taking care of their children. The burden on that becomes*  
170           *slightly lessened because one of their major needs is now fixed and taken care of.”* (KI 9,  
171    Practitioner/Service manager)

172           *“Prevention is always the poor bedfellow of health interventions. People usually want*  
173           *nice hospitals and drugs at the local doctors; and of course that’s understandable. But so*



174 *many other problems could be prevented. And so, it's the importance about prevention."*

175 (KI 2, Researcher)

176 Several KIs expressed the view that housing has multi-dimensional impacts, encompassing  
177 economic, social, and environmental dimensions, and that housing is linked to several SDGs.

178 *"Housing is one of those things that touches everything. It touches job, it touches climate  
179 and touches health. It touches everything."* (KI 8, Practitioner/Service manager)

180 *"When you look at it [the SDGs], and you go through the list asking, 'Can I achieve that  
181 without good housing?', then the answer is no."* (KI 13, Policy advisor)

182 Many KIs highlighted the profound mental health impacts of housing, emphasizing factors such  
183 as decreased stress levels and depression. KI 13 described how mental health problems are more  
184 challenging to cope with in a polluted, noisy environment. Additionally, several KIs indicated  
185 that factors like social status, comfort, and pride associated with one's home affect mental health.

186 KIs highlighted numerous environmental factors associated with housing, including the need to  
187 construct homes with sustainable materials instead of traditionally used materials with large  
188 carbon footprints such as concrete. KI 3 mentioned that the high deforestation in India led to a  
189 new law prohibiting the use of wood in buildings. Similarly, KI 11 described how wood is still  
190 being used as a traditional fuel source in Lesotho for cooking and warming houses, which is  
191 causing harm to the environment.

192 *"It's really obvious that over-dependence on these trees has a negative impact on our  
193 environment because they are being over-exploited."* (KI 11, Service manager/Policy  
194 advisor)

195 Some KIs indicated that growing concerns about climate change have elevated attention toward  
196 housing interventions, particularly climate-resilient housing. KI 13 commented that the impacts  
197 of climate change, including the higher frequency of natural disasters, floods, and heavy winds,  
198 amplify awareness of policy makers regarding the interconnectedness between housing and  
199 health. On a similar note, KI 14 observed that decision-makers tend to pay more attention to  
200 housing when risks become more palpable. Even countries not directly impacted by a natural  
201 disaster, as described by KI 15, are spurred to action to improve housing by global disasters like  
202 earthquakes.

203 Multiple KIs underscored the persistent need for heightened awareness of housing, which  
204 receives less attention than other topics, such as climate change. KIs deliberated on effective  
205 strategies to disseminate the importance of their work and the critical role of housing in  
206 addressing health disparities.

207 *“I feel very strongly that the dissemination, or the communication effort of what we do is*  
208 *almost as important as the implementation work. Because if we get the message out to*  
209 *more people how to do this work, [...] I think we can start to get more impactful benefit*  
210 *for more people.”* (KI 10, Service manager)

211 Multiple KIs pointed out to the significant opportunity within the housing sector due to  
212 anticipated population growth in coming years. They highlighted the potential to build  
213 sustainable houses from the ground up.

214 *“For example, in sub-Saharan Africa, the population will increase by 1.2 billion people.*  
215 *So, that’s like the current population of China or India adding to the continent. They will*

216 *build houses. Whatever you do. And you can build efficient houses off from scratch,*  
217 *which is great.” (KI 2, Researcher)*

### 218 *Breaking silos and sector-building*

219 Several KIs highlighted a prevailing lack of recognition among individuals and sectors regarding  
220 the critical link between housing and health. For example, KI 3 pointed out that malaria research  
221 has predominantly been driven by biologists, who have typically neglected the significance of  
222 housing.

223 *“I don’t think many health professionals are kind of thinking in that way, how the urban*  
224 *fabric for instance is really important for the health of the population.” (KI 3,*  
225 *Researcher)*

226 KI 13 illustrated how ministers of education often do not see the connection between children’s  
227 educational success and their living conditions. Moreover, KI 13 stated a similar challenge in the  
228 case of the ministry of health, saying:

229 *“You know, you can have a lot of gastro-intestinal diseases, respiratory diseases. And all*  
230 *takes place at the home because the house has mold, or you have a dirt floor, or you*  
231 *don’t have toilets. Or you know, the chickens are walking around your house where your*  
232 *kids play.” (KI 13, Policy advisor)*

233 On a similar note, KI 14 suggested that architects and engineers should be educated differently,  
234 considering health factors when building a house. Likewise, KI 2 noted that architects, engineers,  
235 and city planners may possess a limited understanding of mosquitoes and the diseases they  
236 transmit and underscored the necessity for health considerations to transcend the boundaries of  
237 health departments, which traditionally addressed such matters in isolation:

238            *“This is a multi-sectoral response that’s required. [...] What we’ve got to do here is*  
239            *break across silos. There are huge opportunities for changing things.”* (KI 2, Researcher)

240    KI 7 articulated that a challenge for housing is that it does not fit squarely within a specific  
241    sector, like energy or health.

242            *“I think that’s the issue, that this kind of work doesn’t sit anywhere and there’s no clear*  
243            *place for it. So that sector-building work needs to be done.”* (KI 7, Researcher)

244    *Building the evidence base on health impacts and cost-effectiveness*

245    Numerous KIs underscored the ongoing need for further evidence on the impacts of housing  
246    interventions on health, both for securing funding and effectively scaling up housing  
247    improvements. Talking about the scarcity of direct evidence of health impacts, KI 6 noted that  
248    research needs to focus on:

249            *“Understanding in which ways buildings affect health, but it’s also about developing the*  
250            *methodology to assess. Because how do I know that this room for example is affecting*  
251            *me? So, it’s trying to understand the criteria to assess buildings.”* (KI 6, Researcher)

252    KIs consistently emphasized the critical role of a comprehensive cost-benefit analysis; for  
253    example, KI 5 noted that cost-benefit analyses are needed to determine which housing  
254    modifications are most effective for specific diseases.

255    Multiple respondents indicated multiple factors that should be considered when measuring cost-  
256    effectiveness. For example, several KIs noted that households would have fewer repairs (i.e.  
257    lowering operation and maintenance costs) if construction was done with more durable materials.

258            *“So, by creating a better home, which you can have for the next 30 years, you increase*  
259            *the welfare of people. And I mean, that also has to be kind of factored in if you want to*  
260            *assess the benefits of new housing.”* (KI 1, Researcher)

261    Moreover, KI 1 highlighted the importance of successfully showing housing’s impacts on  
262    multiple health aspects to justify the cost of housing interventions. KI 4 pointed out that housing  
263    improvements often benefit all household members, and KI 2 stressed that housing interventions  
264    can protect people with decades; both of these factors will generally increase their cost-  
265    effectiveness relative to individual-based interventions.

266    KI 14 emphasized that by improving housing conditions, expenses on other things, such as  
267    treatment and medications would likely decrease.

268            *“So, if you can have a secure housing, or a core housing, then even your payments in*  
269            *health are going to be reduced, because you are not going to get sick as often.”* (KI 14,  
270            Policy advisor)

271    Similarly, KI 5 noted, that:

272            *“If you look at the cost [of the screening intervention] versus the cost that a household*  
273            *would also spend in managing malaria, it is still cheaper [...] It’s just the lower cost*  
274            *doing the modification then spending \$75 for example in a year to treat malaria – if the*  
275            *children don’t die anyway. Because there’s also the element of death. If you factor in*  
276            *death that you could also suffer as a family as a real cost of not doing the modification.”*  
277            (KI 5, Researcher)

278    KI 10 acknowledged that housing interventions can be extremely expensive and not as cost-  
279    effective as certain pharmaceutical interventions.

280 *“Even when we’re talking about cost-effective household improvements, you can’t get*  
281 *down, as you’re not talking about a dollar vaccine kind of thing. You’re really at a higher*  
282 *rate and so even if they’re longer-term, it just ends up being an expensive intervention*  
283 *and therefore a proper study ends up being a bulky budget.”* (KI 10, Service manager)

284 In discussing its role in the policy-decision process, KI 16 emphasized the importance of  
285 evidence in the policy making process, even if it is not the only relevant factor, saying:

286 *“I think these studies [on housing and health] have definitely helped put in-situ*  
287 *upgrading on the radar of governments, nonprofits, multilaterals, as interventions that*  
288 *may do more to improve human welfare than just improving living conditions. That these*  
289 *can actually have positive effects on human development indicators.”* (KI 16, Policy  
290 advisor)

291 *The role of government, private institutions, and communities in scale-up and need for*  
292 *collaboration*

293 A recurring question became whether a top-down or a bottom-up approach is most effective in  
294 scaling up housing improvements. Several KIs underscored the critical role of government  
295 involvement in effectively scaling up housing interventions.

296 *“Housing programs need to have the national government, the federal government*  
297 *behind. Because it’s only the government level that has the fiscal instruments to do it.”*  
298 (KI 12, Policy advisor)

299 *“We think that the only way this is scalable is if we work with governments, because they*  
300 *are the ones that are mandated by the constitution to provide dignified housing for all.”*  
301 (KI 15, Policy advisor)

302 KI 16 highlighted that in the case of the Piso Firme project, the initial drive for the study  
303 evaluation came from the Mexican government, which was interested in generating evidence for  
304 Piso Firme as a potential low-cost scalable model.

305 *“These were high-level Mexican policy makers looking at the evidence, looking at the*  
306 *cost-effectiveness and making policy decisions on where to allocate their social budget*  
307 *for housing. [...] Piso Firme was able to scale because there was a large government*  
308 *behind it.” (KI 16, Policy advisor)*

309 KI 3 expressed a critical view regarding extensive government involvement in the scale-up  
310 approach, stating:

311 *“I would not be too keen on going with the big governmental institutions. [...] I don’t*  
312 *think it’s solved by institution. I think, a lot of it is solved by private investment, combined*  
313 *with good planning and good support from the government. [...] But when the*  
314 *government starts to build, or big institutions start to build, it always goes wrong. It*  
315 *needs to be something in between.” (KI 3, Researcher)*

316 KI 9 outlined a strategy focused on prioritizing assistance to those in need and emphasized the  
317 significance of fostering community connections to achieve sustainable long-term and replicable  
318 outcomes.

319 *“It wasn’t necessarily about institutions. We obviously want to tackle the institutional*  
320 *disparities, but it wasn’t about starting at the top. It was more about starting at the*  
321 *grassroots, where we can find people who are connected to those larger institutions but*  
322 *who are the ones doing the work, who are the ones that are going to be able to actually*  
323 *implement these processes.” (KI 9, Practitioner/Service manager)*

324 Several KIs discussed how a government’s political orientation influences its housing agenda  
325 and resource distribution. KI 12 delineated how a transition from a right-wing to a left-wing  
326 government precipitated a change in the nation’s housing policy. Similarly, KI 13 noted:

327 *“So, when you have a transition [...] of government [...] the allocation of housing and*  
328 *the type of work you do becomes completely different.”* (KI 13, Policy advisor)

329 Considering the dynamic nature of political landscapes and the brevity of legislative tenures, KI  
330 2 underscored the need for strategies resilient to political fluctuations.

331 *“So, what we’re talking about is long-term strategies that are supported irrespective of*  
332 *the political color of local politicians.”* (KI 2, Researcher)

333 Several KIs recognized the significant influence of the private sector in driving the direction of  
334 housing scale-up. For instance, KI 15 emphasized the pivotal role of the chamber of commerce  
335 in the construction sector as a major policy driver in Colombia. On a similar note, KI 12  
336 observed:

337 *“I mean the private sector has a very important role. Of course you need to be careful.*  
338 *[...] That you [don’t] have housing policies that are led by the private sector completely,*  
339 *that only serve their interest. It happens quite often in many countries.”* (KI 12, Policy  
340 advisor).

341 The importance of community involvement, as emphasized by several KIs, lies in its role in  
342 facilitating the understanding of community perspectives on housing conditions, securing  
343 willingness to implement housing interventions, and establishing project-based policies.



344 *“You need to get the community involved, the people whose lives you are trying to*  
345 *improve. To ask them about and explain [to] them what the issues are and to see their*  
346 *initiatives for improving it.” (KI 2, Researcher)*

347 Several KIs delineated the consequences of insufficient community involvement in health  
348 interventions, noting disparities in perceived priorities between communities and other  
349 stakeholders. KIs provided examples of when health interventions have been repurposed by  
350 communities for more immediate priorities, such as using bed nets for fishing (KI 5),  
351 safeguarding poultry, and protecting crops from insects (KI 6).

352 In discussing the disparity between public stakeholders or government finance sectors and the  
353 communities, KI 7 emphasized that while governments tend to prioritize disease indicators,  
354 communities often have numerous other housing-related considerations that hold greater  
355 importance to them.

356 *“What the biggest burden of disease is [...] doesn't capture the lived experience of*  
357 *somebody living in a poor-quality house which might have many more impacts in terms*  
358 *of the house. The time and energy it takes to deal with a problematic [...] house is not*  
359 *considered.” (KI 7, Researcher)*

360

361 Numerous KIs stressed the importance of extensive stakeholder collaboration and local capacity  
362 building to ensure the effective scale-up of housing improvements.

363 *“It's not only like, ‘okay, because we already changed the policy, things are going to*  
364 *happen just like that’. You also need to have like that cycle and that pipelining, which you*  
365 *can also change, or improve technical competencies at the local level. So, I think our*

366 *challenge is how can you make a pipeline in order to transfer knowledge [about how to*  
367 *build correctly] to all parts of the value chain. And also, how can we learn from it.” (KI*  
368 *14, Policy advisor)*

369 *“And then we need to have people all the way down to like the grassroots level and*  
370 *people who are really doing implementation on the ground, and we need to have like*  
371 *everybody in between. We need to have researchers, we need to have practitioners,*  
372 *everybody involved so that I think we can really make some progress on this.” (KI 10,*  
373 *Service manager)*

374 KI 13 underscored the potential risk of uneven stakeholder influence, emphasizing the  
375 imperative of leading them to a unified mission to guide collective progress.

### 376 *Financing challenges and priorities*

377 While KIs noted diverse financing options for housing interventions, including government  
378 funding, mortgages, and private sector investment, they consistently highlighted inadequate  
379 financing systems and funding as a major obstacle to implementing and scaling up housing  
380 interventions. KIs noted that there is a preference to fund disease-specific, pharmaceutical  
381 interventions over broader housing interventions, possibly due to limited evidence on housing  
382 interventions and higher cost.

383 KI 10 noted a common response from potential funders, expressing skepticism about housing as  
384 a proven health intervention. A dilemma arising from the scarcity of existing evidence and lack  
385 of interest in supporting the generation of new evidence was described by KI 7:

386 *“I think it’s a bit chicken and egg, like there’s no data on it but then there’s nobody*  
387 *collecting the data that we need and therefore it’s not getting the exposure, or the focus.”*

388 (KI 7, Researcher)

389 KI 9 highlighted a tension in the funding landscape, noting that smaller funders often prioritize  
390 seeing direct impact over rigorous research. In comparison, bigger funders demand more  
391 stringent evidence evaluation but do not prioritize and focus on housing.

392 Several KIs mentioned that housing is competing for budget and resources with other sectors and  
393 stakeholders, posing another challenge in financing housing improvements. Discussing the  
394 reluctance of some governments to invest in housing interventions, KI 12 noted that this is:

395 *“Either because they don’t want to raise taxes, or they don’t want to cut expenditures in*  
396 *other sectors to just spend in modern housing.”* (KI 12, Policy advisor)

397 Similarly, KI 9 noted that housing sometimes is:

398 *“Competing for space, competing for solutions between NGOs and between those who*  
399 *are actually trying to do good work.”* (KI 9, Practitioner/Service manager)

#### 400 *Policy and regulatory framework*

401 Multiple KIs highlighted the pivotal role of policy in enabling the sustainable and efficient  
402 scaling up of housing interventions, as they dictate the manner of construction while also  
403 regulating and standardizing the process. According to KIs, promoting social justice and human  
404 rights within housing policies and constitutions is another cornerstone of the regulatory  
405 framework. Using an example involving screening windows and doors, KI 2 discussed the role  
406 of policies in housing interventions:

407 *“You could shape the buildings of the future by having local bylaws, or enacting bylaws*  
408 *which say that all houses should be screened. You could reduce tax on importation of*  
409 *screening [to]encourage house screening.” (KI 2, Researcher)*

410 *“So, if you could make local zoning rules and building codes that are actually*  
411 *reasonable, that would be good.” (KI 3, Researcher)*

412 KI 12 stressed that the existence of housing policies does not guarantee improved housing  
413 conditions.

414 *“We’re seeing a lot of countries that have policies and no implementation because it is*  
415 *just like a piece of paper.” (KI 12, Policy advisor)*

416 Several KIs highlighted that poorly or inadequately formulated policies can impede the delivery  
417 of healthy housing solutions. They observed that housing policies in several countries contain  
418 blind spots because they tend to over-emphasize economic factors, and they are often  
419 disconnected from the communities or those implementing housing improvements. KI 13 stated:

420 *“If I am a minister of housing that focuses on economic growth, I can be very convincing*  
421 *and I can structure all my products around that. But there is a huge price for the*  
422 *vulnerable families.” (KI 13, Policy advisor)*

423 *“I think there’s a real gap between people who are writing policy and people who are*  
424 *implementing the work and getting action done.” (KI 10, Service manager)*

425 Another aspect discussed by KIs is the issue of housing ownership, which adds to the complexity  
426 of the regulatory framework. KI 7 described that, unlike the public nature of the healthcare  
427 system, housing operates within a complex private market with various ownership models,

428 posing difficulties to widespread interventions. Discussing the likelihood of housing  
429 interventions being scaled up, KI 7 noted:

430 *“In a situation where you have public ownership of housing and social housing, and you*  
431 *have more involvement from the state, then it’s probably more likely. But when you have*  
432 *very privatized markets, where land is really expensive, when housing itself is a*  
433 *commodity, [...] then it becomes quite difficult.” (KI 7, Researcher)*

434 *Addressing contextual and operational challenges*

435 Multiple respondents pointed out that a lack of skills and knowledge among local populations  
436 hinders the implementation and scaling-up of housing improvements. This can result in poor  
437 quality of construction and unsafe buildings. KI 8 noted:

438 *“The labor market doesn’t exist really to very easily train a bunch of masons. So, we*  
439 *need a whole apprenticeship program.” (KI 8, Practitioner/Service manager)*

440 In discussions on operational challenges, KIs emphasized considerable logistics and costs of  
441 transporting construction materials to some areas. Additionally, they noted the lack of supply  
442 chain and distribution networks as further obstacles.

443 *“Then another market failure is on supply chain. [...] there’s no FedEx here, there’s not*  
444 *like a UPS. Like, every person has to create their own last-mile distribution network. And*  
445 *that is very expensive.” (KI 8, Practitioner/Service manager)*

446 KI 3 highlighted the low degree of industrial manufacturing in some countries and how the need  
447 for manual labor to build homes by hand dramatically raises costs and reduces the scaling up of  
448 improved housing.

449 *“I mean, the success of a house in our parts of the world [high income settings] is*  
450 *because it’s highly industrial today and you can build very efficient and also very good.”*

451 (KI 3, Researcher)

452 Multiple interviewees emphasized the necessity of considering contextual factors specific to each  
453 region or community when implementing or scaling up housing policies and interventions, as the  
454 materials, climate, and cultural norms and practices vary across different geographical areas.

455 *“So, what kind of environment? What kind of people? How do they live their lives? You,*  
456 *know, it’s important because you will not take the same interventions everywhere.”* (KI 5,

457 Researcher)

458 *“I would go with that context-specific approach where I would say, before allocating*  
459 *resources, I would do my groundwork and say, ‘which is the biggest challenge in this*  
460 *particular region?’”* (KI 4, Researcher)

461 According to KI 9, a consequence of not correctly adjusting programs to their context is that  
462 solutions and interventions have become very templated, where people rely on what worked in  
463 the past and try to apply it in the same manner in another context.

464 *“Just because it’s the same problem doesn’t necessarily mean that it necessitates the*  
465 *same solution.”* (KI 9, Practitioner/Service manager)

466

## 467 **Discussion**

468 This study contributes to the literature on housing and health by exploring facilitators of and  
469 barriers to funding, implementing, and scaling up housing interventions as health interventions.

470 We identified seven major themes from key informant interviews that shed light on the  
471 multifaceted nature of housing interventions and their implications for public health.

472 KIs unanimously agreed that housing modifications could reduce transmission of  
473 environmentally mediated infections as well as a broader set of outcomes, including mental  
474 health and life satisfaction. This finding is in accordance with previous literature showing  
475 reduced depression rates and stress levels upon housing improvements [14]. Similarly, two  
476 studies conducted in Ecuador [23] and Vietnam [24] showed that housing satisfaction is a strong  
477 predictor and key driver of life satisfaction, underscoring the importance of housing  
478 interventions. KIs consistently stated that housing interventions should be prioritized within  
479 health and development agendas as a complement to existing strategies, such as WASH  
480 interventions.

481 KIs emphasized a pervasive shortage of funding and financial systems for  
482 implementation and scale-up of housing interventions. A 2019 study elucidated that broader  
483 measures like housing interventions are usually less recognized than disease-specific  
484 interventions and, consequently, lack financial support [17]. As several KIs indicated, promoting  
485 awareness of the significance of housing interventions is essential to garner greater support and  
486 investment. KIs articulated a need for more rigorous evidence on health impacts of housing as  
487 well as precise cost-benefit analyses, including a wide range of outcomes, to attracting donor  
488 funding [17]. However, they also noted a lack of interest in and funding to generate new  
489 evidence on housing interventions.

490 With regard to implementation and scale-up of housing interventions, KIs also revealed  
491 that community involvement and governmental commitment are key factors. A 2012 qualitative  
492 study on barriers to scaling up health interventions in low- and middle-income countries found

493 that initiatives often fail without engaging local implementers and recipient communities [25].  
494 Moreover, the author emphasized the crucial role of national leaders in scaling up, a standpoint  
495 echoed by multiple KIs who acknowledged the pivotal role of government involvement in  
496 scaling up [25].

497 KIs stressed the urgent need to break silos and collaborate across disciplines to stimulate  
498 research and action on housing and health. The importance of strong intersectoral collaboration  
499 has been emphasized for other interventions; for example, the success of Singapore's dengue  
500 control program was attributed to close cooperation among various government ministries, town  
501 councils, communities, the private sector, and academic and research institutions alongside a  
502 legislative framework [26]. Similarly, KIs emphasized the fundamental role of project-based and  
503 context-specific housing policies in addressing social determinants of health such as housing.  
504 This sentiment resonates with a 2021 comparative housing policy study, emphasizing the  
505 importance of integrated policy responses across relevant areas to effectively address the strong  
506 association between housing and health [27].

507 There were several limitations of this study. The relatively small number of stakeholders  
508 (n = 16) may have restricted the diversity of viewpoints and themes. Furthermore, we did not  
509 have KIs from government or communities, who could have provided valuable insights.  
510 Similarly, we only invited KIs who could complete the interview in English, which may have  
511 limited the diversity of perspectives in this study. Lastly, the broad spectrum of housing  
512 interventions was discussed in a generic manner, which may have overlooked nuances specific to  
513 particular interventions.

514



## 515 **Conclusions**

516 In conclusion, this study underscores the significant potential of housing interventions in  
517 mitigating environmentally mediated diseases, offering an expansive approach to addressing  
518 multiple health challenges simultaneously. Recommendations stemming from this research  
519 include the urgent need to break down silos and foster collaboration among stakeholders, as well  
520 as to improve awareness and education surrounding housing interventions. Concerted efforts  
521 across disciplines and sectors are imperative to ensure healthy housing and achieve sustainable  
522 development goals. Furthermore, efforts to prioritize housing interventions on the policy agenda  
523 and to align diverse interests among stakeholders are essential for their effective implementation  
524 and scale-up. Additionally, investing in generating rigorous evidence and promoting project-  
525 based policies will be crucial for advancing the efficacy and impact of housing interventions in  
526 improving public health outcomes.

## 527 **Declarations**

### 528 *Ethics approval and consent to participate*

529 This study was approved by the IRB (Protocol # 2023-11-16941) by the Office for Protection of  
530 Human Subjects (OPHS) of the University of California, Berkeley. In addition, the study was  
531 approved by the ETH Zurich Ethics Commission (EK-2023-N-317).

532 Participants provided informed consent prior to each respective interview.

### 533 *Consent for publication*

534 Not applicable.

### 535 *Availability of data and materials*

536 The datasets generated and analyzed during the current study are not publicly available due to  
537 identifiable content.

### 538 *Competing interests*

539 The authors declare that they have no competing interests.

540 *Funding*

541 Not applicable.

542 *Authors' contributions*

543 JG and MA developed the original study concept, with JBC providing initial assistance. MA  
544 acquired data and conducted data processing and led manuscript writing. JBC and JG advised on  
545 interview guides, interviewee recruitment, and manuscript writing. All authors read and  
546 approved the final manuscript.

547 *Acknowledgements*

548 Research reported in this publication was supported in part by the National Institute of Child  
549 Health and Human Development under Award Numbers R01HD108196 (PI: Benjamin-Chung).  
550 The content is solely the responsibility of the authors and does not necessarily represent the  
551 official views of the National Institutes of Health. Jade Benjamin-Chung is a Chan Zuckerberg  
552 Biohub Investigator.

## 554 **References**

- 555 1. Mara DD, Alabaster GP. An environmental classification of housing-related diseases in  
556 developing countries. *J Trop Med Hyg.* 1995;98:41–51.
- 557 2. World Health Organization. WHO housing and health guidelines. Geneva, Switzerland: World  
558 Health Organization; 2018.
- 559 3. United Nations. Global Indicator Framework for the Sustainable Development Goals and  
560 Targets of the 2030 Agenda for Sustainable Development. 2017.
- 561 4. Behr DM, Chen L, Goel A, Haider KT, Singh S-C, Zaman A. Introducing the Adequate  
562 Housing Index (AHI) : A New Approach to Estimate the Adequate Housing Deficit within and  
563 across Emerging Economies. 2021.
- 564 5. Tusting LS, Bisanzio D, Alabaster G, Cameron E, Cibulskis R, Davies M, et al. Mapping  
565 changes in housing in sub-Saharan Africa from 2000 to 2015. *Nature.* 2019;568:391–4.
- 566 6. ICF, 2012. The DHS Program STATcompiler. Funded by USAID.  
567 <http://www.statcompiler.com>. [Accessed 5.21.24].
- 568 7. Sokolow SH, Nova N, Jones IJ, Wood CL, Lafferty KD, Garchitorena A, et al. Ecological and  
569 socioeconomic factors associated with the human burden of environmentally mediated  
570 pathogens: a global analysis. *Lancet Planet Health.* 2022;6:e870–9.
- 571 8. Strunz EC, Addiss DG, Stocks ME, Ogden S, Utzinger J, Freeman MC. Water, Sanitation,  
572 Hygiene, and Soil-Transmitted Helminth Infection: A Systematic Review and Meta-Analysis.  
573 *PLoS Med.* 2014;11:e1001620.
- 574 9. Cairncross S, Hunt C, Boisson S, Bostoen K, Curtis V, Fung IC, et al. Water, sanitation and  
575 hygiene for the prevention of diarrhoea. *Int J Epidemiol.* 2010;39 suppl\_1:i193–205.
- 576 10. Grimes JET, Croll D, Harrison WE, Utzinger J, Freeman MC, Templeton MR. The  
577 Relationship between Water, Sanitation and Schistosomiasis: A Systematic Review and Meta-  
578 analysis. *PLoS Negl Trop Dis.* 2014;8:e3296.
- 579 11. Taylor DL, Kahawita TM, Cairncross S, Ensink JHJ. The Impact of Water, Sanitation and  
580 Hygiene Interventions to Control Cholera: A Systematic Review. *PLOS ONE.*  
581 2015;10:e0135676.
- 582 12. Cumming O, Curtis V. Implications of WASH Benefits trials for water and sanitation. *Lancet*  
583 *Glob Health.* 2018;6:e613–4.
- 584 13. Pickering AJ, Null C, Winch PJ, Mangwadu G, Arnold BF, Prendergast AJ, et al. The  
585 WASH Benefits and SHINE trials: interpretation of WASH intervention effects on linear growth  
586 and diarrhoea. *Lancet Glob Health.* 2019;7:e1139–46.
- 587 14. Cattaneo MD, Galiani S, Gertler PJ, Martinez S, Titiunik R. Housing, Health, and Happiness.  
588 *Am Econ J Econ Policy.* 2009;1:75–105.
- 589 15. Legge H, Pullan RL, Sartorius B. Improved household flooring is associated with lower odds  
590 of enteric and parasitic infections in low- and middle-income countries: A systematic review and  
591 meta-analysis. *PLOS Glob Public Health.* 2023;3:e0002631.
- 592 16. Mshamu S, Mmbando A, Meta J, Bradley J, Bøjstrup TC, Day NPJ, et al. Assessing the  
593 impact of a novel house design on the incidence of malaria in children in rural Africa: study  
594 protocol for a household-cluster randomized controlled superiority trial. *Trials.* 2022;23:519.
- 595 17. Von Seidlein L, Wood H, Brittain OS, Tusting L, Bednarz A, Mshamu S, et al. Knowledge  
596 gaps in the construction of rural healthy homes: A research agenda for improved low-cost  
597 housing in hot-humid Africa. *PLOS Med.* 2019;16:e1002909.
- 598 18. Von Seidlein L, Ikonomidis K, Mshamu S, Nkya TE, Mukaka M, Pell C, et al. Affordable  
599 house designs to improve health in rural Africa: a field study from northeastern Tanzania. *Lancet*

- 600 Planet Health. 2017;1:e188–99.
- 601 19. Kua KP, Lee SWH. Randomized trials of housing interventions to prevent malaria and  
602 Aedes-transmitted diseases: A systematic review and meta-analysis. PLOS ONE.  
603 2021;16:e0244284.
- 604 20. Tusting LS, Ippolito MM, Willey BA, Kleinschmidt I, Dorsey G, Gosling RD, et al. The  
605 evidence for improving housing to reduce malaria: a systematic review and meta-analysis. Malar  
606 J. 2015;14:209.
- 607 21. Braun V, Clarke V. Using thematic analysis in psychology. Qual Res Psychol. 2006;3:77–  
608 101.
- 609 22. Braun V, Clarke V. One size fits all? What counts as quality practice in (reflexive) thematic  
610 analysis? Qual Res Psychol. 2021;18:328–52.
- 611 23. Pontarollo N, Orellana M, Segovia J. The Determinants of Subjective Well-Being in a  
612 Developing Country: The Ecuadorian Case. J Happiness Stud. 2020;21:3007–35.
- 613 24. Tran TQ, Van Vu H. A microeconomic analysis of housing and life satisfaction among the  
614 Vietnamese elderly. Qual Quant. 2017;52:849–67.
- 615 25. Yamey G. What are the barriers to scaling up health interventions in low and middle income  
616 countries? A qualitative study of academic leaders in implementation science. Glob Health.  
617 2012;8:11.
- 618 26. Sim S, Ng LC, Lindsay SW, Wilson AL. A greener vision for vector control: The example of  
619 the Singapore dengue control programme. PLoS Negl Trop Dis. 2020;14:e0008428.
- 620 27. Mwoka M, Biermann O, Ettman CK, Abdalla SM, Ambuko J, Pearson M, et al. Housing as a  
621 Social Determinant of Health: Evidence from Singapore, the UK, and Kenya: the 3-D  
622 Commission. J Urban Health. 2021;98:15–30.
- 623 28. Monroy C, Bustamante DM, Pineda S, Rodas A, Castro X, Ayala V, et al. House  
624 improvements and community participation in the control of *Triatoma dimidiata* re-infestation in  
625 Jutiapa, Guatemala. Cad Saude Pública. 2009;25 suppl 1:S168–78.
- 626 29. Benjamin-Chung J, Crider YS, Mertens A, Ercumen A, Pickering AJ, Lin A, et al.  
627 Household finished flooring and soil-transmitted helminth and *Giardia* infections among children  
628 in rural Bangladesh and Kenya: a prospective cohort study. Lancet Glob Health. 2021;9:e301–8.
- 629 30. Knols BGJ, Farenhorst M, Andriessen R, Snetselaar J, Suer RA, Osinga AJ, et al. Eave tubes  
630 for malaria control in Africa: an introduction. Malar J. 2016;15:404.
- 631

632 **Tables**

633 **Table 1.** Basic demographic information about key informants. Identifying information has been  
634 removed to protect key informants' anonymity.

| <b>Key informant</b> | <b>Current position</b>                                     | <b>Experience relevant to housing interventions</b>                                                                                                   | <b>Region primarily worked in</b> | <b>Description</b> | <b>Interview guide used</b> |
|----------------------|-------------------------------------------------------------|-------------------------------------------------------------------------------------------------------------------------------------------------------|-----------------------------------|--------------------|-----------------------------|
| 1                    | Professor of Public Health in Asia                          | Developing housing innovations aimed at managing and eradicating various diseases such as malaria, respiratory tract infections, and enteric diseases | Africa                            | Researcher         | Researcher/Implementer      |
| 2                    | Professor of Public Health Entomology in Europe             | Modifying modern housing with increased ventilation, closed eaves, and screenings                                                                     | Africa                            | Researcher         | Researcher/Implementer      |
| 3                    | Head of Architecture in a European university               | Developing housing innovations aimed at managing and eradicating various diseases such as malaria, respiratory tract infections, and enteric diseases | Africa                            | Researcher         | Researcher/Implementer      |
| 4                    | Researcher in an academic organization in Africa            | Improving housing temporary structures for migratory farmers to reduce vector-borne diseases                                                          | Africa                            | Researcher         | Researcher/Implementer      |
| 5                    | Researcher in an academic organization in Africa            | Modifying eaves and screening of windows and doors                                                                                                    | Africa                            | Researcher         | Researcher/Implementer      |
| 6                    | Professor of Environmental Design and Engineering in Europe | Researching the relationship between housing and moisture-related diseases                                                                            | Global                            | Researcher         | Researcher/Implementer      |

It is made available under a [CC-BY 4.0 International license](https://creativecommons.org/licenses/by/4.0/) .

|    |                                                                        |                                                                                                                                                                                  |                            |                                    |                            |
|----|------------------------------------------------------------------------|----------------------------------------------------------------------------------------------------------------------------------------------------------------------------------|----------------------------|------------------------------------|----------------------------|
| 7  | Researcher in a European University                                    | Creating and evaluating housing improvements to reduce heat- and cold exposure, respiratory infections, and indoor mosquito density                                              | Global                     | Researcher                         | Researcher/<br>Implementer |
| 8  | Senior leadership role at a social enterprise in Africa                | Delivering sustainable flooring solutions and novel housing solutions in developing countries                                                                                    | Africa                     | Practitioner/<br>Service manager   | Researcher/<br>Implementer |
| 9  | Senior leadership position at an international non-profit organization | Implementing sustainable solutions, such as concrete floors, to vulnerable populations                                                                                           | Central America            | Practitioner/<br>Service manager   | Researcher/<br>Implementer |
| 10 | Senior leadership position at an international NGO                     | Overseeing implementation of housing interventions to combat several diseases                                                                                                    | Global                     | Service manager                    | Researcher/<br>Implementer |
| 11 | Country Program Director in an international non-profit organization   | Assisting the implementation of housing improvements for vulnerable populations; assistance in the improvement of housing policies                                               | Africa                     | Service manager/<br>Policy advisor | Policy                     |
| 12 | Senior Urban Specialist at an international development bank           | Working on interventions to increase access to land through land use planning; projects that finance housing improvements; supporting governments on developing housing policies | Central- and South America | Policy advisor                     | Policy                     |
| 13 | Senior Urban Specialist at an international development bank           | Supporting client LMI-countries to improve existing housing & reduce vulnerability to natural                                                                                    | Southeast Asia             | Policy advisor                     | Policy                     |

It is made available under a [CC-BY 4.0 International license](https://creativecommons.org/licenses/by/4.0/) .

---

|    |                                                                                       |                                                                                                        |               |                   |        |
|----|---------------------------------------------------------------------------------------|--------------------------------------------------------------------------------------------------------|---------------|-------------------|--------|
|    |                                                                                       | hazards & climate change<br>through financial                                                          |               |                   |        |
| 14 | Country<br>Program<br>Director in an<br>international<br>non-profit<br>organization   | Specializing in disaster-<br>resilient housing solutions in<br>vulnerable regions                      | South America | Policy<br>advisor | Policy |
| 15 | Country<br>Program<br>Director in an<br>international<br>non-profit<br>organization   | Specializing in disaster-<br>resilient housing solutions in<br>vulnerable regions                      | South America | Policy<br>advisor | Policy |
| 16 | Senior<br>leadership<br>position at an<br>international<br>non-profit<br>organization | Overseeing policy-relevant<br>evidence generation and<br>impact evaluation of<br>housing interventions | Global        | Policy<br>advisor | Policy |

---

635

636 **Figures**

637 **Figure 1.** Overview of housing interventions aiming to reduce environmentally mediated  
638 infectious diseases.

639

640 Legend: A) Constructing a second floor with a raised sleeping area to ensure airflow and  
641 decrease mosquito entry [16]. B) Applying wall plasters to smooth out crevices and prevent  
642 vector-borne diseases (e.g. Chagas) [28]. C) Lifting houses above the ground to reduce the risk  
643 of enteric and soil-transmitted infections and minimize mosquito entry [18]. D) Replacing dirt  
644 floors with finished floors to reduce exposure to microbial pathogens, including protozoa and  
645 soil-transmitted helminths [14, 29]. E) Installing eave tubes to reduce mosquito entry while  
646 maintaining airflow [30]. F) Installing screened openings to reduce mosquito entry while  
647 ensuring sufficient airflow [16]. (Artwork by Victor Oleg Leshyk)



**A**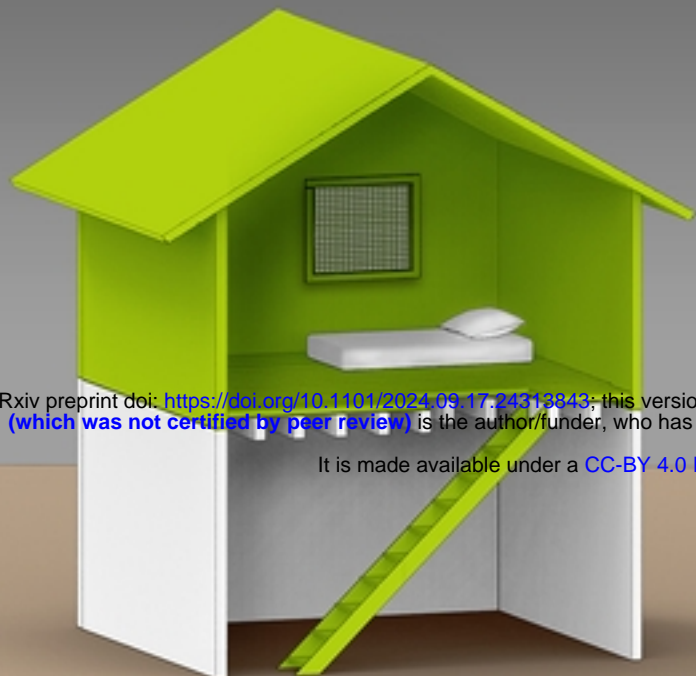**B**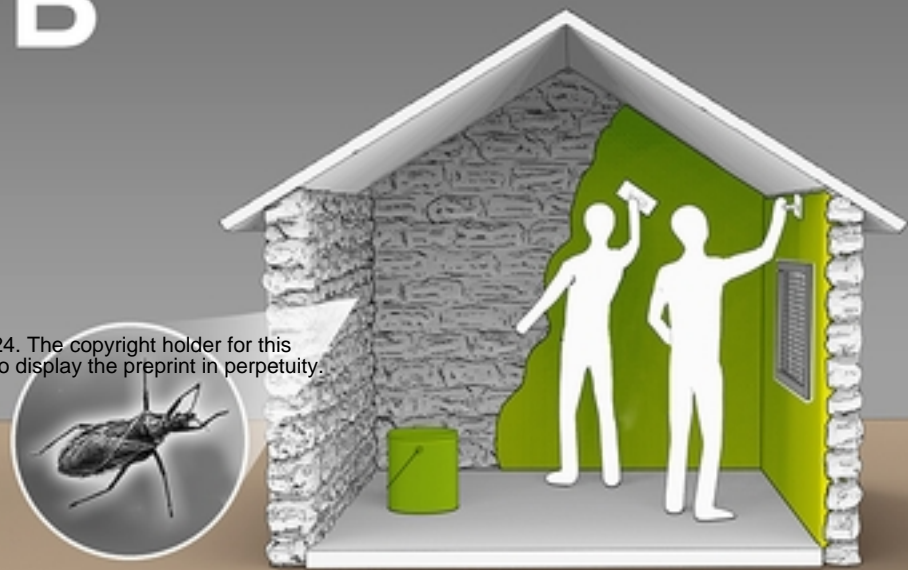

medRxiv preprint doi: <https://doi.org/10.1101/2024.09.17.24313843>; this version posted September 19, 2024. The copyright holder for this preprint (which was not certified by peer review) is the author/funder, who has granted medRxiv a license to display the preprint in perpetuity.

It is made available under a [CC-BY 4.0 International license](https://creativecommons.org/licenses/by/4.0/).

**C**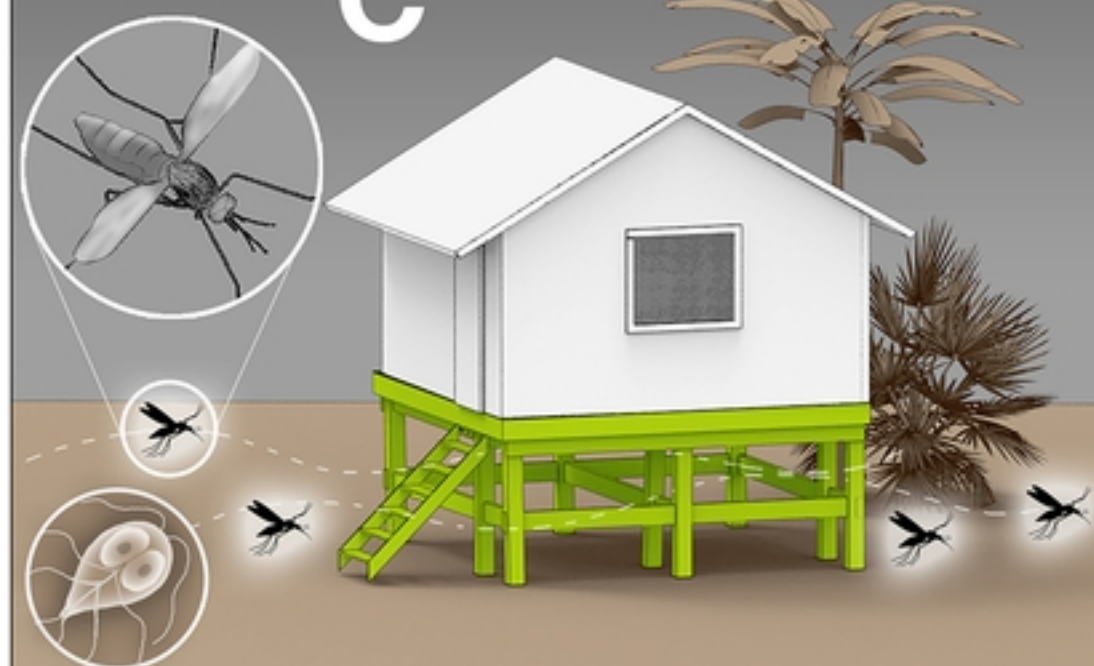**D**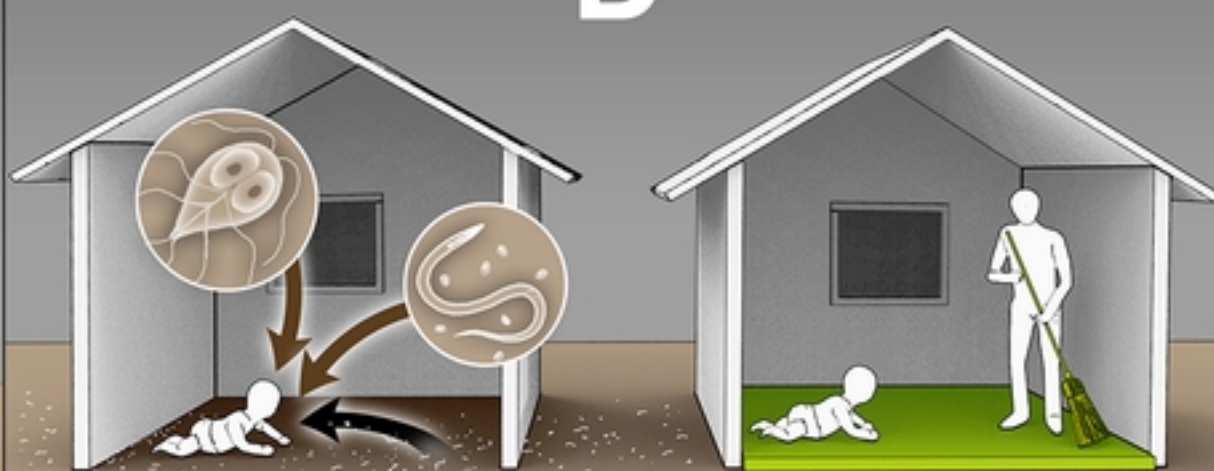**E**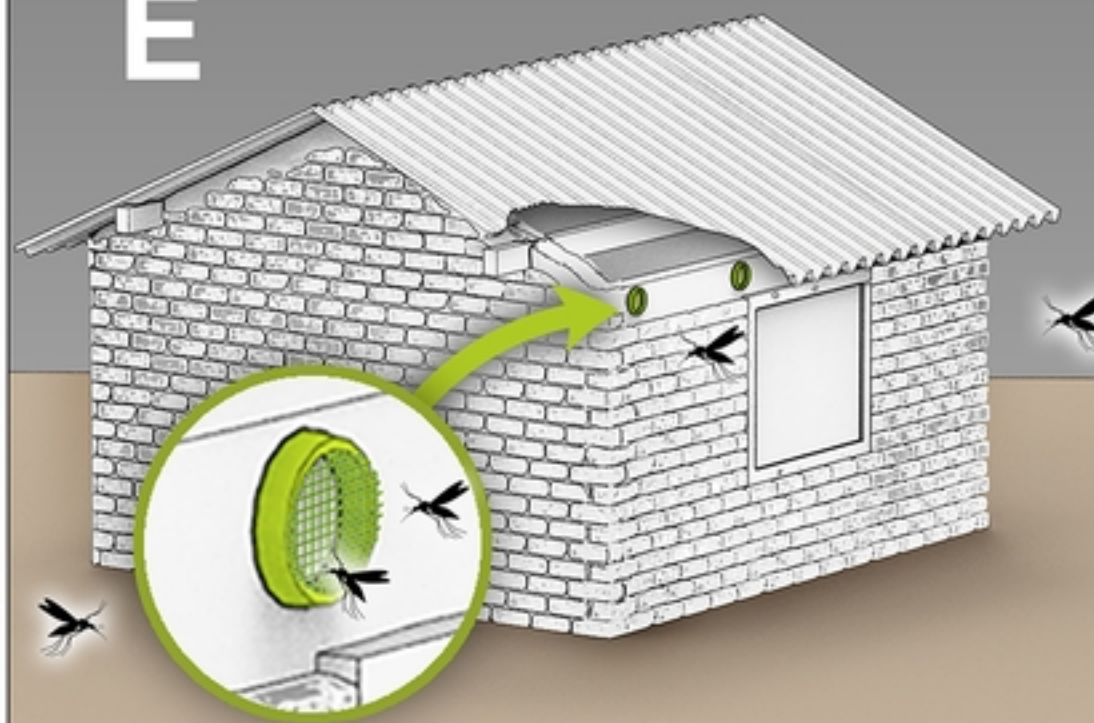**F**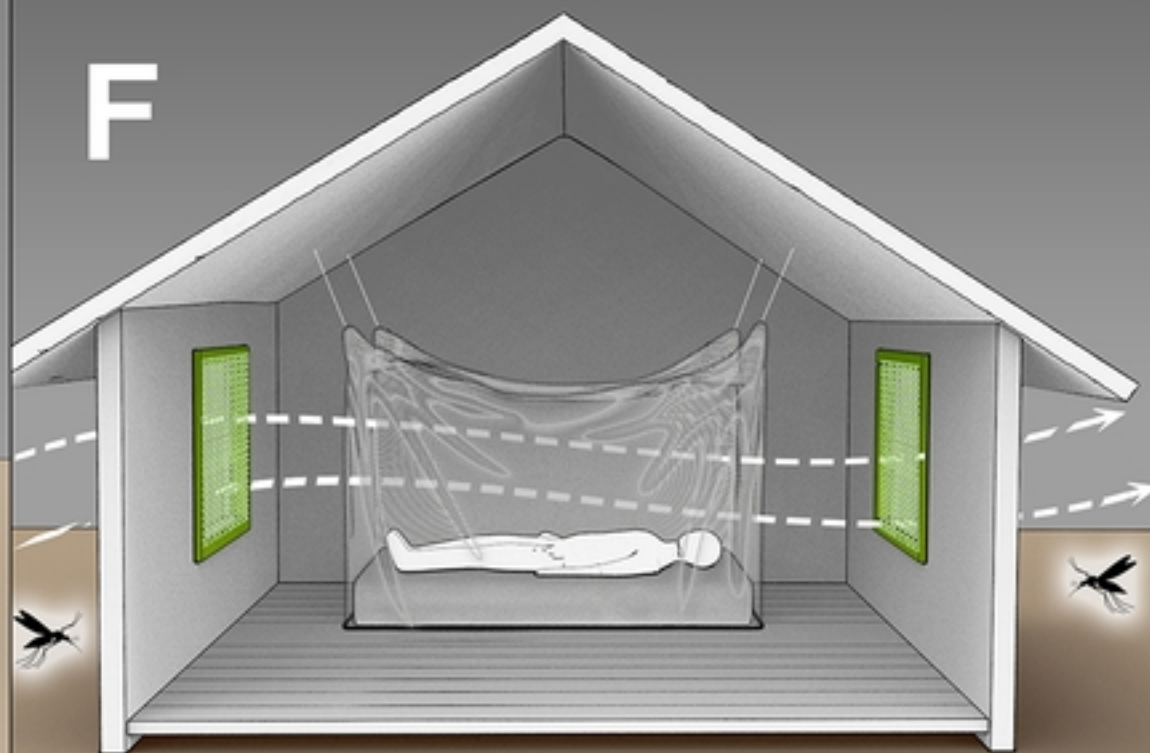

Figure
